# Supplementary material for: Metallocene: multi-layered molecular rotors
Source: Royal Society of Chemistry journal article supplement (doi:10.1039/d1dt02291a), 2021-01-01
Supplement: d1dt02291a9.pdf [file d1dt02291a9.pdf]

## Supporting Information for Metallocene: Multi-layered Molecular Rotors

Rui Yu,<sup>a</sup> Song Xu,<sup>b</sup> Meng-hui Wang,<sup>a</sup> Tao Yang,<sup>\*b</sup> and Zhong-hua Cui,<sup>\*ac</sup>

*<sup>a</sup>Institute of Atomic and Molecular Physics, Key Laboratory of Physics and Technology for Advanced Batteries (Ministry of Education), Jilin University, Changchun 130023, China;*

*E-mail: zcui@jlu.edu.cn*

*<sup>b</sup>Key Laboratory for Non-Equilibrium Synthesis and Modulation of Condensed Matter (Ministry of Education), School of Physics, Xi'an Jiaotong University, Xi'an 710049, China;*

*E-mail: taoyang1@xjtu.edu.cn*

*<sup>c</sup>Beijing National Laboratory for Molecular Sciences*

**Table S1.** The C-M bond distances in Å, WBI values, and NPA charges of M atom in |e| of LM of M(Cp)<sub>2</sub><sup>q</sup>, M(Bz)<sub>2</sub><sup>q</sup>, and M(Cp)(Bz)<sup>q</sup> were computed at the PBE0-D3/def2-TZVP level.

| Species                          | B <sub>C-M</sub> | WBI <sub>C-M</sub> | Q <sub>M</sub> |
|----------------------------------|------------------|--------------------|----------------|
| Mn(Cp) <sub>2</sub> <sup>-</sup> | 2.065            | 0.45               | -0.79          |
| Fe(Cp) <sub>2</sub>              | 2.043            | 0.42               | -0.54          |
| Co(Cp) <sub>2</sub> <sup>+</sup> | 2.036            | 0.41               | -0.29          |
| V(Bz) <sub>2</sub> <sup>-</sup>  | 2.174            | 0.43               | -1.08          |
| Cr(Bz) <sub>2</sub>              | 2.134            | 0.42               | -1.22          |
| Mn(Bz) <sub>2</sub> <sup>+</sup> | 2.120            | 0.39               | -0.72          |
| Cr(Cp)(Bz) <sup>-</sup>          | 2.169            | 0.38               | -1.10          |
| Mn(Cp)(Bz)                       | 2.100            | 0.45               | -0.74          |
| Fe(Cp)(Bz) <sup>+</sup>          | 2.055            | 0.45               | -0.54          |

**Table S2.** The C-M bond distances in Å, WBI values, and NPA charges of M atom in |e| of TS of M(Cp)<sub>2</sub><sup>q</sup>, M(Bz)<sub>2</sub><sup>q</sup>, and M(Cp)(Bz)<sup>q</sup> were computed at the PBE0-D3/def2-TZVP level.

| Species                          | B <sub>C-M</sub> | WBI <sub>C-M</sub> | Q <sub>M</sub> |
|----------------------------------|------------------|--------------------|----------------|
| Mn(Cp) <sub>2</sub> <sup>-</sup> | 2.071            | 0.44               | -0.78          |
| Fe(Cp) <sub>2</sub>              | 2.046            | 0.42               | -0.53          |
| Co(Cp) <sub>2</sub> <sup>+</sup> | 2.037            | 0.41               | -0.28          |
| V(Bz) <sub>2</sub> <sup>-</sup>  | 2.176            | 0.43               | -1.08          |
| Cr(Bz) <sub>2</sub>              | 2.137            | 0.42               | -1.22          |
| Mn(Bz) <sub>2</sub> <sup>+</sup> | 2.122            | 0.39               | -0.72          |
| Cr(Cp)(Bz) <sup>-</sup>          | 2.168            | 0.38               | -1.10          |
| Mn(Cp)(Bz)                       | 2.100            | 0.42               | -0.74          |
| Fe(Cp)(Bz) <sup>+</sup>          | 2.055            | 0.45               | -0.54          |

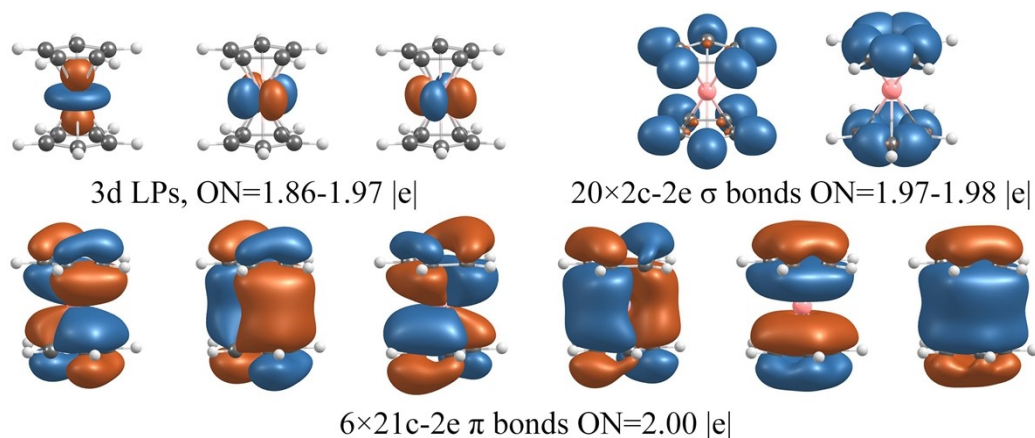

**Figure S1.** AdNDP analysis for the **TS** of  $\text{Fe}(\text{Cp})_2$  computed at the PBE0-D3/def2-TZVP level. Occupation numbers (ON) in |e|.

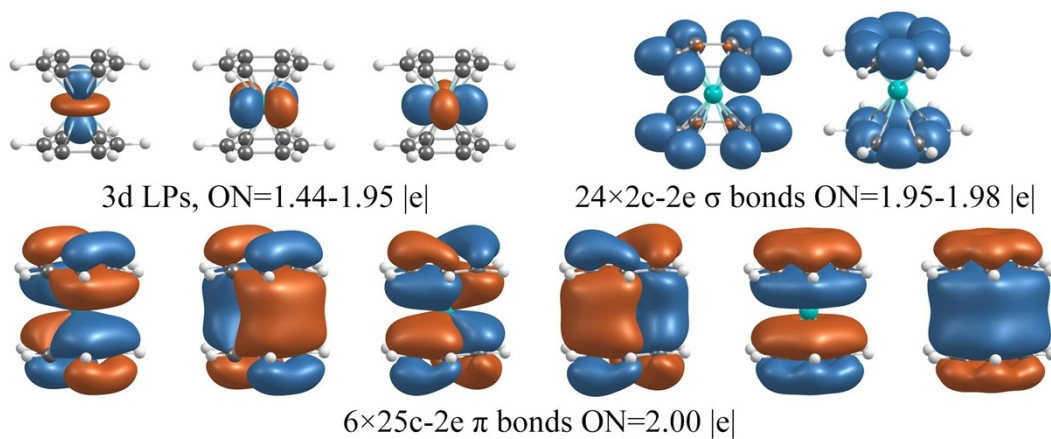

**Figure S2.** AdNDP analysis for the **LM** of  $\text{Cr}(\text{Bz})_2$  computed at the PBE0-D3/def2-TZVP level. Occupation numbers (ON) in |e|.

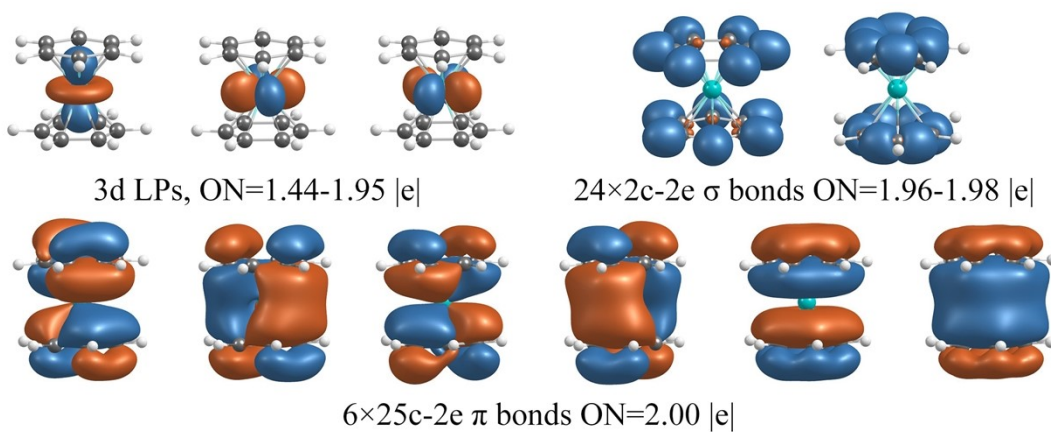

**Figure S3.** AdNDP analysis for the **TS** of  $\text{Cr}(\text{Bz})_2$  computed at the PBE0-D3/def2-

TZVP level. Occupation numbers (ON) in |e|.

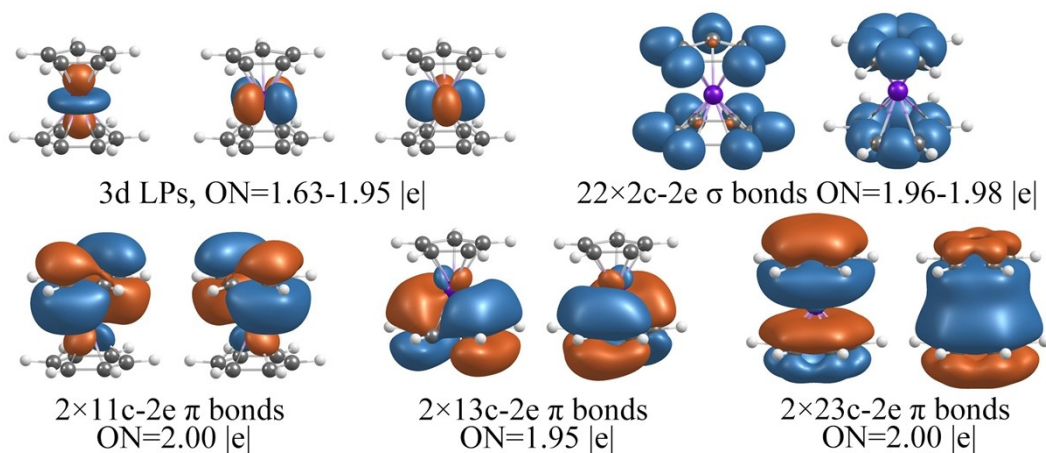

**Figure S4.** AdNDP analysis for the LM of Mn(Cp)(Bz) computed at the PBE0-D3/def2-TZVP level. Occupation numbers (ON) in |e|.

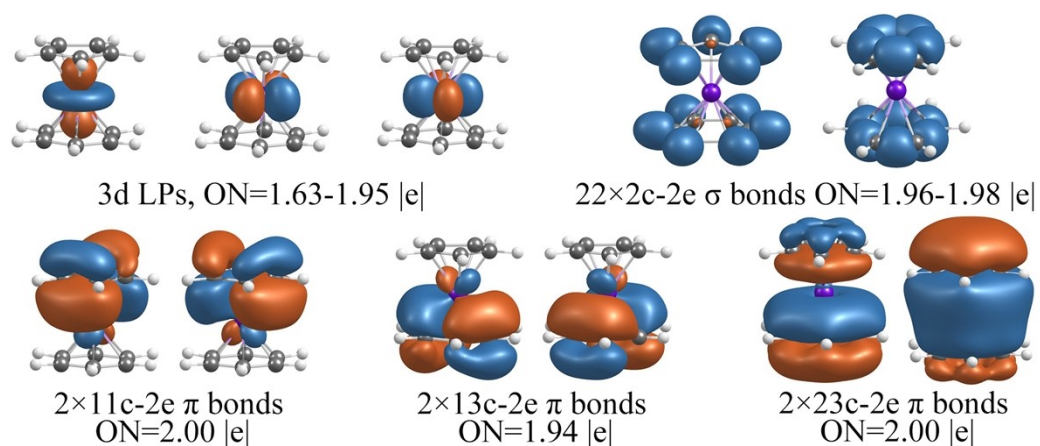

**Figure S5.** AdNDP analysis for the TS of Mn(Cp)(Bz) computed at the PBE0-D3/def2-TZVP level. Occupation numbers (ON) in |e|.

**Table S3.** EDA-NOCV results using  $\text{Fe}^{2+}$  and  $\text{Cp}_2^{2-}$  as interacting fragments at BP86-D3(BJ)/TZ2P. All values are in kcal/mol.

|                       |                                                            | $\text{Fe}(\text{Cp})_2 \rightarrow \text{Fe}^{2+} (\text{singlet}) + \text{Cp}_2^{2-} (\text{singlet})$ |                |                             |
|-----------------------|------------------------------------------------------------|----------------------------------------------------------------------------------------------------------|----------------|-----------------------------|
|                       |                                                            | LM                                                                                                       | TS             | $\Delta E_{(\text{TS-LM})}$ |
| $\Delta E_{eb}$       | energy barrier without ZPE                                 | 0.0                                                                                                      | +1.0           | +1.0                        |
| $\Delta E_{deform1}$  | deformation energy of $\text{Cp}_2^{2-}$                   | 0.0                                                                                                      | -0.4           | -0.4                        |
| $\Delta E_{deform2}$  | deformation energy of $\text{Fe}^{2+}$                     | 0.0                                                                                                      | 0.0            | 0.0                         |
| $\Delta E_{int}$      | –                                                          | -899.1                                                                                                   | -897.6         | +1.5                        |
| $\Delta E_{pauli}$    | –                                                          | +291.1                                                                                                   | +287.7         | -3.4                        |
| $\Delta E_{disp}$     | –                                                          | -2.8                                                                                                     | -2.8           | 0.0                         |
| $\Delta E_{elstat}^a$ | –                                                          | -623.6 (52.5%)                                                                                           | -622.1 (52.6%) | +1.5                        |
| $\Delta E_{orba}$     | –                                                          | -563.8 (47.5%)                                                                                           | -560.4 (47.4%) | +3.4                        |
| $\Delta E_{orb(1)}^b$ | $\text{Fe}^{2+} \leftarrow \text{Cp}_2^{2-}$ back-donation | -179.6 (31.8%)                                                                                           | -178.4 (31.8%) | –                           |
| $\Delta E_{orb(2)}^b$ | $\text{Fe}^{2+} \leftarrow \text{Cp}_2^{2-}$ back-donation | -179.6 (31.8%)                                                                                           | -178.4 (31.8%) | –                           |

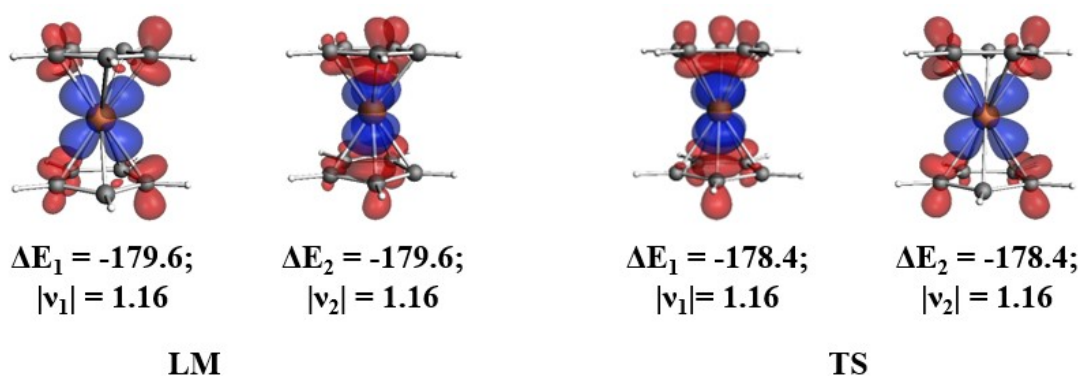

**Figure S6.** Deformation densities  $\Delta\rho$  that are connected with the pairwise orbital interactions in  $\text{Fe}(\text{Cp})_2$  at BP86-D3(BJ)/TZ2P. The charge flow of the electronic charge is red  $\rightarrow$  blue. The associated orbital interaction energies  $\Delta E$  are given in kcal/mol. The eigenvalues  $\nu$  indicate the size of the charge flow.



**Table S4.** EDA-NOCV results using Cr and Bz<sub>2</sub> as interacting fragments at BP86-D3(BJ)/TZ2P. All values are in kcal/mol.

|                       |                                       | Cr(Bz) <sub>2</sub> → Cr (singlet) + Bz <sub>2</sub> (singlet) |                |                      |
|-----------------------|---------------------------------------|----------------------------------------------------------------|----------------|----------------------|
|                       |                                       | LM                                                             | TS             | $\Delta E_{(TS-LM)}$ |
| $\Delta E_{eb}$       | energy barrier without ZPE            | 0.0                                                            | +1.6           | +1.6                 |
| $\Delta E_{deform1}$  | deformation energy of Bz <sub>2</sub> | 0.0                                                            | -0.1           | -0.1                 |
| $\Delta E_{deform2}$  | deformation energy of Cr              | 0.0                                                            | 0.0            | 0.0                  |
| $\Delta E_{int}$      | –                                     | -272.1                                                         | -270.6         | +1.5                 |
| $\Delta E_{pauli}$    | –                                     | +377.7                                                         | +372.6         | -5.1                 |
| $\Delta E_{disp}$     | –                                     | -3.5                                                           | -3.5           | 0.0                  |
| $\Delta E_{elstat}^a$ | –                                     | -258.5 (40.0%)                                                 | -255.8 (40.0%) | +2.7                 |
| $\Delta E_{orba}$     | –                                     | -387.8 (60.0%)                                                 | -383.9 (60.0%) | +3.9                 |
| $\Delta E_{orb(1)b}$  | Cr → Bz <sub>2</sub> back-donation    | -139.6 (36.0%)                                                 | -138.2 (36.0%) | –                    |
| $\Delta E_{orb(2)b}$  | Cr → Bz <sub>2</sub> back-donation    | -139.6 (36.0%)                                                 | -138.2 (36.0%) | –                    |

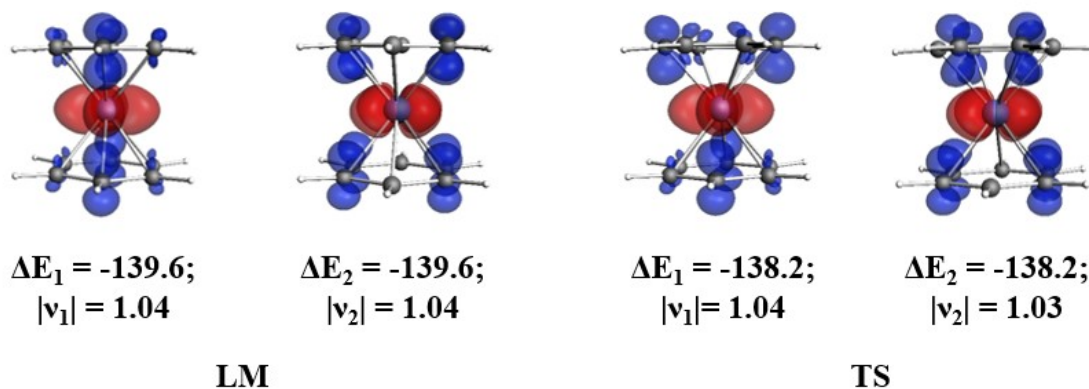

**Figure S7.** Deformation densities  $\Delta\rho$  that are connected with the pairwise orbital interactions in Cr(Bz)<sub>2</sub> at BP86-D3(BJ)/TZ2P. The charge flow of the electronic charge is red → blue. The associated orbital interaction energies  $\Delta E$  are given in kcal/mol. The eigenvalues  $v$  indicate the size of the charge flow.

**Table S5.** EDA-NOCV results using  $\text{Mn}^+$  and  $(\text{Cp})(\text{Bz})^-$  as interacting fragments at BP86-D3(BJ)/TZ2P. All values are in kcal/mol.

|                       |                                                            | $\text{Mn}(\text{Cp})(\text{Bz}) \rightarrow \text{Mn}^+ (\text{singlet})$<br>$+ (\text{Cp})(\text{Bz})^- (\text{singlet})$ |                |                             |
|-----------------------|------------------------------------------------------------|-----------------------------------------------------------------------------------------------------------------------------|----------------|-----------------------------|
|                       |                                                            | LM                                                                                                                          | TS             | $\Delta E_{(\text{TS-LM})}$ |
| $\Delta E_{eb}$       | energy barrier without ZPE deformation                     | 0.0                                                                                                                         | -0.1           | -0.1                        |
| $\Delta E_{deform1}$  | energy of $(\text{Cp})(\text{Bz})^-$ deformation           | 0.0                                                                                                                         | 0.0            | 0.0                         |
| $\Delta E_{deform2}$  | energy of $\text{Mn}^+$                                    | 0.0                                                                                                                         | 0.0            | 0.0                         |
| $\Delta E_{int}$      | –                                                          | -392.8                                                                                                                      | -392.7         | +0.1                        |
| $\Delta E_{pauli}$    | –                                                          | +325.6                                                                                                                      | +325.6         | 0.0                         |
| $\Delta E_{disp}$     | –                                                          | -2.4                                                                                                                        | -2.4           | 0.0                         |
| $\Delta E_{elstat}^a$ | –                                                          | -319.0 (44.6%)                                                                                                              | -319.0 (44.6%) | 0.0                         |
| $\Delta E_{orb}^a$    | –                                                          | -397.0 (55.4%)                                                                                                              | -396.9 (55.4%) | +0.1                        |
| $\Delta E_{orb(1)b}$  | $\text{Mn}^+ \leftarrow (\text{Cp})(\text{Bz})^-$ donation | -79.4 (20.0%)                                                                                                               | -79.3 (20.0%)  | –                           |
| $\Delta E_{orb(2)b}$  | $\text{Mn}^+ \leftarrow (\text{Cp})(\text{Bz})^-$ donation | -79.3 (20.0%)                                                                                                               | -79.3 (20.0%)  | –                           |
| $\Delta E_{orb(3)b}$  | $\text{Mn}^+ \leftarrow (\text{Cp})(\text{Bz})^-$ donation | -73.4 (18.5%)                                                                                                               | -73.4 (18.5%)  | –                           |
| $\Delta E_{orb(4)b}$  | $\text{Mn}^+ \leftarrow (\text{Cp})(\text{Bz})^-$ donation | -73.2 (18.4%)                                                                                                               | -73.3 (18.5%)  | –                           |

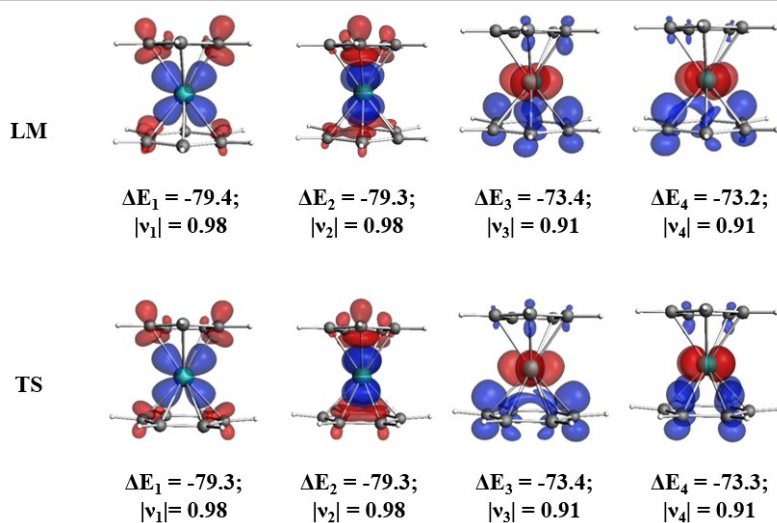

**Figure S8.** Deformation densities  $\Delta\rho$  that are connected with the pairwise orbital interactions in  $\text{Mn}(\text{Cp})(\text{Bz})$  at BP86-D3(BJ)/TZ2P. The charge flow of the electronic



charge is red  $\rightarrow$  blue. The associated orbital interaction energies  $\Delta E$  are given in kcal/mol. The eigenvalues  $v$  indicate the size of the charge flow.

We also considered the neutral model for EDA-NOCV analysis. In this model, the  $\text{Mn}(\text{Cp})(\text{Bz})$  was separated to be  $\text{Mn}(\text{doublet}) + (\text{CpBz})(\text{doublet})$  while  $\text{Fe}(\text{Cp})_2$  was decomposed to be  $\text{Fe}(\text{triplet})$  and  $(\text{Cp})_2(\text{triplet})$ . Because EDA-NOCV analysis at BP86/TZ2P failed in calculating the neutral  $\text{Mn}(\text{doublet})$  and  $\text{Fe}(\text{triplet})$ , we switched to B3LYP/TZ2P. As shown in Tables S6 and S7, the  $|\Delta E_{\text{orb}}|$  in EDA-NOCV results using neutral fragments in both  $\text{Mn}(\text{Cp})(\text{Bz})$  and  $\text{Fe}(\text{Cp})_2$  is larger than that in corresponding ionic fragments. Those results suggest that the ionic fragments with dative scheme is more reasonable.

**Table S6.** EDA-NOCV results using  $\text{Mn}^+$  and  $(\text{Cp})(\text{Bz})^-$  and using  $\text{Mn}$  and  $(\text{Cp})(\text{Bz})$  as interacting fragments at B3LYP(BJ)/TZ2P. All values are in kcal/mol.

|                            | <b><math>\text{Mn}(\text{Cp})(\text{Bz}) \rightarrow \text{Mn}^+</math> (singlet)</b> |           | <b><math>\text{Mn}(\text{Cp})(\text{Bz}) \rightarrow \text{Mn}</math> (doublet)</b> |           |
|----------------------------|---------------------------------------------------------------------------------------|-----------|-------------------------------------------------------------------------------------|-----------|
|                            | <b>+ <math>(\text{Cp})(\text{Bz})^-</math> (singlet)</b>                              |           | <b>+ <math>(\text{Cp})(\text{Bz})</math> (doublet)</b>                              |           |
|                            | <b>LM</b>                                                                             | <b>TS</b> | <b>LM</b>                                                                           | <b>TS</b> |
| $\Delta E_{\text{int}}$    | -314.0                                                                                | -313.5    | -190.0                                                                              | -187.4    |
| $\Delta E_{\text{Pauli}}$  | +460.1                                                                                | +567.6    | +956.4                                                                              | +1079.1   |
| $\Delta E_{\text{disp}}$   | -2.4                                                                                  | -2.4      | -2.4                                                                                | -2.4      |
| $\Delta E_{\text{elstat}}$ | -367.9                                                                                | -401.3    | -506.9                                                                              | -565.0    |
| $\Delta E_{\text{orb}}$    | -403.8                                                                                | -477.4    | -637.2                                                                              | -699.1    |

**Table S7.** EDA-NOCV results using  $\text{Fe}^{2+}$  and  $(\text{Cp})_2^{2-}$  and using  $\text{Fe}$  and  $(\text{Cp})_2$  as interacting fragments at B3LYP(BJ)/TZ2P. All values are in kcal/mol.

|                            | <b><math>\text{Fe}(\text{Cp})_2 \rightarrow \text{Fe}^{2+}</math> (singlet)</b> |           | <b>+ <math>\text{Fe}(\text{Cp})_2 \rightarrow \text{Fe}</math> (triplet)</b> |           |
|----------------------------|---------------------------------------------------------------------------------|-----------|------------------------------------------------------------------------------|-----------|
|                            | <b>+ <math>(\text{Cp})_2^{2-}</math> (singlet)</b>                              |           | <b>+ <math>(\text{Cp})_2</math> (triplet)</b>                                |           |
|                            | <b>LM</b>                                                                       | <b>TS</b> | <b>LM</b>                                                                    | <b>TS</b> |
| $\Delta E_{\text{int}}$    | -840.8                                                                          | -839.5    | -219.1                                                                       | -218.7    |
| $\Delta E_{\text{Pauli}}$  | +294.3                                                                          | +290.7    | +969.1                                                                       | +880.8    |
| $\Delta E_{\text{disp}}$   | -2.9                                                                            | -2.9      | -2.9                                                                         | -2.9      |
| $\Delta E_{\text{elstat}}$ | -620.6                                                                          | -618.9    | -543.9                                                                       | -531.2    |
| $\Delta E_{\text{orb}}$    | -511.6                                                                          | -508.4    | -650.4                                                                       | -565.4    |

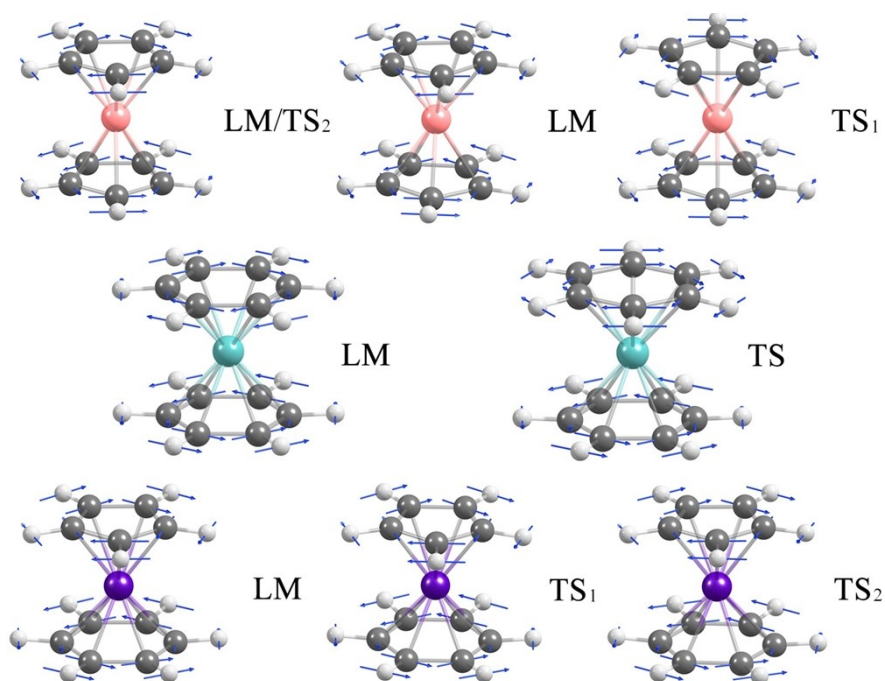

**Figure S9.** Displacement vectors of soft vibrational mode of the **LM** and imaginary soft vibrational mode of the **TS**. The order and name of complexes can be checked in Figure 1.

**Table S8.** Period ( $T_{\text{rot}}$ , s) and frequency ( $\nu_{\text{rot}}$ , THz) associated with the rotation system of  $\text{M}(\text{Cp})_2^q$ ,  $\text{M}(\text{Bz})_2^q$  and  $\text{M}(\text{Cp})(\text{Bz})^q$  at the PBE0-D3/def2-SVP level.

| System                              | $T_{\text{rot}}$ (s)      | $\nu_{\text{rot}}$ (THz) |
|-------------------------------------|---------------------------|--------------------------|
| $\text{Mn}(\text{Cp})_2^-$          | $2.23264 \times 10^{-12}$ | 0.44790                  |
| $\text{Fe}(\text{Cp})_2$            | $6.05437 \times 10^{-12}$ | 0.16517                  |
| $\text{Co}(\text{Cp})_2^+$          | $2.13799 \times 10^{-12}$ | 0.46773                  |
| $\text{V}(\text{Bz})_2^-$           | $1.75759 \times 10^{-12}$ | 0.56896                  |
| $\text{Cr}(\text{Bz})_2$            | $1.72328 \times 10^{-12}$ | 0.58029                  |
| $\text{Mn}(\text{Bz})_2^+$          | $2.64859 \times 10^{-12}$ | 0.37756                  |
| $\text{Cr}(\text{Cp})(\text{Bz})^-$ | $5.96872 \times 10^{-12}$ | 0.16754                  |
| $\text{Mn}(\text{Cp})(\text{Bz})$   | $6.75813 \times 10^{-12}$ | 0.14797                  |
| $\text{Fe}(\text{Cp})(\text{Bz})^+$ | $9.72573 \times 10^{-12}$ | 0.10282                  |

I. Coordinates obtained at the PBE0-D3/def2-TZVP level.

Fe(Cp)<sub>2</sub>, LM

Frequencies = 13.6997 cm<sup>-1</sup>

HF = -1650.2887743 a.u.

|    |              |              |              |
|----|--------------|--------------|--------------|
| 26 | 0.000000000  | 0.000000000  | 0.000000000  |
| 6  | 1.208332000  | 0.000000000  | -1.647501000 |
| 6  | 0.373395000  | 1.149192000  | -1.647501000 |
| 6  | -0.977561000 | 0.710240000  | -1.647501000 |
| 6  | -0.977561000 | -0.710240000 | -1.647501000 |
| 6  | 0.373395000  | -1.149192000 | -1.647501000 |
| 1  | 2.287325000  | 0.000000000  | -1.620124000 |
| 1  | 0.706822000  | 2.175376000  | -1.620124000 |
| 1  | -1.850485000 | 1.344456000  | -1.620124000 |
| 1  | -1.850485000 | -1.344456000 | -1.620124000 |
| 1  | 0.706822000  | -2.175376000 | -1.620124000 |
| 6  | 1.208332000  | 0.000000000  | 1.647501000  |
| 6  | 0.373395000  | 1.149192000  | 1.647501000  |
| 6  | -0.977561000 | 0.710240000  | 1.647501000  |
| 6  | -0.977561000 | -0.710240000 | 1.647501000  |
| 6  | 0.373395000  | -1.149192000 | 1.647501000  |
| 1  | 2.287325000  | 0.000000000  | 1.620124000  |
| 1  | 0.706822000  | 2.175376000  | 1.620124000  |
| 1  | -1.850485000 | 1.344456000  | 1.620124000  |
| 1  | -1.850485000 | -1.344456000 | 1.620124000  |
| 1  | 0.706822000  | -2.175376000 | 1.620124000  |

Fe(Cp)<sub>2</sub>, TS

Frequencies = -54.2000 cm<sup>-1</sup>

HF = -1650.2877382 a.u.

|    |              |              |              |
|----|--------------|--------------|--------------|
| 26 | 0.000000000  | 0.000000000  | 0.000000000  |
| 6  | 0.000000000  | -1.207942000 | -1.651384000 |
| 6  | 1.148821000  | -0.373275000 | -1.651384000 |
| 6  | 0.710011000  | 0.977246000  | -1.651384000 |
| 6  | -0.710011000 | 0.977246000  | -1.651384000 |
| 6  | -1.148821000 | -0.373275000 | -1.651384000 |
| 1  | 0.000000000  | -2.286918000 | -1.619650000 |
| 1  | 2.174988000  | -0.706697000 | -1.619650000 |
| 1  | 1.344217000  | 1.850156000  | -1.619650000 |
| 1  | -1.344217000 | 1.850156000  | -1.619650000 |
| 1  | -2.174988000 | -0.706697000 | -1.619650000 |
| 6  | -0.710011000 | -0.977246000 | 1.651384000  |
| 6  | 0.710011000  | -0.977246000 | 1.651384000  |
| 6  | 1.148821000  | 0.373275000  | 1.651384000  |

|   |              |              |             |
|---|--------------|--------------|-------------|
| 6 | 0.000000000  | 1.207942000  | 1.651384000 |
| 6 | -1.148821000 | 0.373275000  | 1.651384000 |
| 1 | -1.344217000 | -1.850156000 | 1.619650000 |
| 1 | 1.344217000  | -1.850156000 | 1.619650000 |
| 1 | 2.174988000  | 0.706697000  | 1.619650000 |
| 1 | 0.000000000  | 2.286918000  | 1.619650000 |
| 1 | -2.174988000 | 0.706697000  | 1.619650000 |

**Mn(Cp)<sub>2</sub><sup>-</sup>, LM**

Frequencies = 62.0042 cm<sup>-1</sup>

HF = -1537.5688891 a.u.

|    |              |              |              |
|----|--------------|--------------|--------------|
| 25 | 0.000000000  | 0.000000000  | 0.000000000  |
| 6  | -1.213889000 | 0.000000000  | -1.670336000 |
| 6  | -0.375112000 | -1.154477000 | -1.670336000 |
| 6  | 0.982056000  | -0.713506000 | -1.670336000 |
| 6  | 0.982056000  | 0.713506000  | -1.670336000 |
| 6  | -0.375112000 | 1.154477000  | -1.670336000 |
| 1  | -2.295787000 | 0.000000000  | -1.667684000 |
| 1  | -0.709437000 | -2.183424000 | -1.667684000 |
| 1  | 1.857331000  | -1.349430000 | -1.667684000 |
| 1  | 1.857331000  | 1.349430000  | -1.667684000 |
| 1  | -0.709437000 | 2.183424000  | -1.667684000 |
| 6  | -1.213889000 | 0.000000000  | 1.670336000  |
| 6  | -0.375112000 | -1.154477000 | 1.670336000  |
| 6  | 0.982056000  | -0.713506000 | 1.670336000  |
| 6  | 0.982056000  | 0.713506000  | 1.670336000  |
| 6  | -0.375112000 | 1.154477000  | 1.670336000  |
| 1  | -2.295787000 | 0.000000000  | 1.667684000  |
| 1  | -0.709437000 | -2.183424000 | 1.667684000  |
| 1  | 1.857331000  | -1.349430000 | 1.667684000  |
| 1  | 1.857331000  | 1.349430000  | 1.667684000  |
| 1  | -0.709437000 | 2.183424000  | 1.667684000  |

**Mn(Cp)<sub>2</sub><sup>-</sup>, TS**

Frequencies = -59.7834 cm<sup>-1</sup>

HF = -1537.5665772 a.u.

|    |              |              |             |
|----|--------------|--------------|-------------|
| 25 | 0.000000000  | 0.000000000  | 0.000000000 |
| 6  | 0.000000000  | 1.213407000  | 1.677847000 |
| 6  | 1.154019000  | 0.374963000  | 1.677847000 |
| 6  | 0.713223000  | -0.981667000 | 1.677847000 |
| 6  | -0.713223000 | -0.981667000 | 1.677847000 |
| 6  | -1.154019000 | 0.374963000  | 1.677847000 |
| 1  | 0.000000000  | 2.295251000  | 1.668058000 |
| 1  | 2.182914000  | 0.709272000  | 1.668058000 |

|   |              |              |              |
|---|--------------|--------------|--------------|
| 1 | 1.349115000  | -1.856897000 | 1.668058000  |
| 1 | -1.349115000 | -1.856897000 | 1.668058000  |
| 1 | -2.182914000 | 0.709272000  | 1.668058000  |
| 6 | -0.713223000 | 0.981667000  | -1.677847000 |
| 6 | 0.713223000  | 0.981667000  | -1.677847000 |
| 6 | 1.154019000  | -0.374963000 | -1.677847000 |
| 6 | 0.000000000  | -1.213407000 | -1.677847000 |
| 6 | -1.154019000 | -0.374963000 | -1.677847000 |
| 1 | -1.349115000 | 1.856897000  | -1.668058000 |
| 1 | 1.349115000  | 1.856897000  | -1.668058000 |
| 1 | 2.182914000  | -0.709272000 | -1.668058000 |
| 1 | 0.000000000  | -2.295251000 | -1.668058000 |
| 1 | -2.182914000 | -0.709272000 | -1.668058000 |

Co(Cp)<sub>2</sub><sup>+</sup>, LM

Frequencies = 46.1896 cm<sup>-1</sup>

HF = -1769.1254591 a.u.

|    |              |              |              |
|----|--------------|--------------|--------------|
| 27 | 0.000000000  | 0.000000000  | 0.000000000  |
| 6  | -0.294936000 | -1.171409000 | 1.639091000  |
| 6  | -1.205217000 | -0.081484000 | 1.639091000  |
| 6  | -0.449929000 | 1.121049000  | 1.639091000  |
| 6  | 0.927145000  | 0.774331000  | 1.639091000  |
| 6  | 1.022936000  | -0.642486000 | 1.639091000  |
| 1  | -0.558132000 | -2.217873000 | 1.605854000  |
| 1  | -2.281795000 | -0.154546000 | 1.605854000  |
| 1  | -0.852095000 | 2.122358000  | 1.605854000  |
| 1  | 1.755171000  | 1.466235000  | 1.605854000  |
| 1  | 1.936850000  | -1.216175000 | 1.605854000  |
| 6  | -0.449929000 | -1.121049000 | -1.639091000 |
| 6  | -1.205217000 | 0.081484000  | -1.639091000 |
| 6  | -0.294936000 | 1.171409000  | -1.639091000 |
| 6  | 1.022936000  | 0.642486000  | -1.639091000 |
| 6  | 0.927145000  | -0.774331000 | -1.639091000 |
| 1  | -0.852095000 | -2.122358000 | -1.605854000 |
| 1  | -2.281795000 | 0.154546000  | -1.605854000 |
| 1  | -0.558132000 | 2.217873000  | -1.605854000 |
| 1  | 1.936850000  | 1.216175000  | -1.605854000 |
| 1  | 1.755171000  | -1.466235000 | -1.605854000 |

Co(Cp)<sub>2</sub><sup>+</sup>, TS

Frequencies = -25.8928 cm<sup>-1</sup>

HF = -1769.1254061 a.u.

|    |             |             |             |
|----|-------------|-------------|-------------|
| 27 | 0.000000000 | 0.000000000 | 0.000000000 |
| 6  | 1.208024000 | 0.000000000 | 1.638675000 |

|   |              |              |              |
|---|--------------|--------------|--------------|
| 6 | 0.373300000  | -1.148899000 | 1.638675000  |
| 6 | -0.977312000 | -0.710059000 | 1.638675000  |
| 6 | -0.977312000 | 0.710059000  | 1.638675000  |
| 6 | 0.373300000  | 1.148899000  | 1.638675000  |
| 1 | 2.287077000  | 0.000000000  | 1.605135000  |
| 1 | 0.706746000  | -2.175139000 | 1.605135000  |
| 1 | -1.850284000 | -1.344310000 | 1.605135000  |
| 1 | -1.850284000 | 1.344310000  | 1.605135000  |
| 1 | 0.706746000  | 2.175139000  | 1.605135000  |
| 6 | 1.208024000  | 0.000000000  | -1.638675000 |
| 6 | 0.373300000  | -1.148899000 | -1.638675000 |
| 6 | -0.977312000 | -0.710059000 | -1.638675000 |
| 6 | -0.977312000 | 0.710059000  | -1.638675000 |
| 6 | 0.373300000  | 1.148899000  | -1.638675000 |
| 1 | 2.287077000  | 0.000000000  | -1.605135000 |
| 1 | 0.706746000  | -2.175139000 | -1.605135000 |
| 1 | -1.850284000 | -1.344310000 | -1.605135000 |
| 1 | -1.850284000 | 1.344310000  | -1.605135000 |
| 1 | 0.706746000  | 2.175139000  | -1.605135000 |

Co(Cp)<sub>2</sub><sup>+</sup>, TS

Frequencies = -44.1538 cm<sup>-1</sup>

HF = -1769.1249558 a.u.

|    |              |              |              |
|----|--------------|--------------|--------------|
| 27 | 0.000000000  | 0.000000000  | 0.000000000  |
| 6  | 0.709958000  | -0.977173000 | -1.640322000 |
| 6  | 1.148736000  | 0.373247000  | -1.640322000 |
| 6  | 0.000000000  | 1.207852000  | -1.640322000 |
| 6  | -1.148736000 | 0.373247000  | -1.640322000 |
| 6  | -0.709958000 | -0.977173000 | -1.640322000 |
| 1  | 1.344205000  | -1.850140000 | -1.603610000 |
| 1  | 2.174970000  | 0.706690000  | -1.603610000 |
| 1  | 0.000000000  | 2.286898000  | -1.603610000 |
| 1  | -2.174970000 | 0.706690000  | -1.603610000 |
| 1  | -1.344205000 | -1.850140000 | -1.603610000 |
| 6  | 0.000000000  | -1.207852000 | 1.640322000  |
| 6  | 1.148736000  | -0.373247000 | 1.640322000  |
| 6  | 0.709958000  | 0.977173000  | 1.640322000  |
| 6  | -0.709958000 | 0.977173000  | 1.640322000  |
| 6  | -1.148736000 | -0.373247000 | 1.640322000  |
| 1  | 0.000000000  | -2.286898000 | 1.603610000  |
| 1  | 2.174970000  | -0.706690000 | 1.603610000  |
| 1  | 1.344205000  | 1.850140000  | 1.603610000  |
| 1  | -1.344205000 | 1.850140000  | 1.603610000  |
| 1  | -2.174970000 | -0.706690000 | 1.603610000  |

**Cr(Bz)<sub>2</sub>, LM**Frequencies = 43.0210 cm<sup>-1</sup>

HF = -1508.3976674 a.u.

|    |              |              |              |
|----|--------------|--------------|--------------|
| 24 | 0.000000000  | 0.000000000  | 0.000000000  |
| 6  | -1.221456000 | -0.705208000 | 1.601204000  |
| 6  | -1.221456000 | 0.705208000  | 1.601204000  |
| 6  | 0.000000000  | -1.410416000 | 1.601204000  |
| 1  | -2.158823000 | 1.246397000  | 1.551696000  |
| 1  | 0.000000000  | -2.492794000 | 1.551696000  |
| 6  | 0.000000000  | 1.410416000  | 1.601204000  |
| 6  | 1.221456000  | -0.705208000 | 1.601204000  |
| 1  | 0.000000000  | 2.492794000  | 1.551696000  |
| 1  | 2.158823000  | -1.246397000 | 1.551696000  |
| 6  | 1.221456000  | 0.705208000  | 1.601204000  |
| 1  | 2.158823000  | 1.246397000  | 1.551696000  |
| 1  | -2.158823000 | -1.246397000 | 1.551696000  |
| 6  | 1.221456000  | -0.705208000 | -1.601204000 |
| 6  | 1.221456000  | 0.705208000  | -1.601204000 |
| 6  | 0.000000000  | -1.410416000 | -1.601204000 |
| 1  | 2.158823000  | 1.246397000  | -1.551696000 |
| 1  | 0.000000000  | -2.492794000 | -1.551696000 |
| 6  | 0.000000000  | 1.410416000  | -1.601204000 |
| 6  | -1.221456000 | -0.705208000 | -1.601204000 |
| 1  | 0.000000000  | 2.492794000  | -1.551696000 |
| 1  | -2.158823000 | -1.246397000 | -1.551696000 |
| 6  | -1.221456000 | 0.705208000  | -1.601204000 |
| 1  | -2.158823000 | 1.246397000  | -1.551696000 |
| 1  | 2.158823000  | -1.246397000 | -1.551696000 |

**Cr(Bz)<sub>2</sub>, TS**Frequencies = -64.6490 cm<sup>-1</sup>

HF = -1508.3959912 a.u.

|    |              |              |             |
|----|--------------|--------------|-------------|
| 24 | 0.000000000  | 0.000000000  | 0.000000000 |
| 6  | 0.000000000  | 1.409970000  | 1.606411000 |
| 6  | 1.221069000  | 0.704985000  | 1.606411000 |
| 6  | -1.221069000 | 0.704985000  | 1.606411000 |
| 1  | 2.158325000  | 1.246109000  | 1.555511000 |
| 1  | -2.158325000 | 1.246109000  | 1.555511000 |
| 6  | 1.221069000  | -0.704985000 | 1.606411000 |
| 6  | -1.221069000 | -0.704985000 | 1.606411000 |
| 1  | 2.158325000  | -1.246109000 | 1.555511000 |
| 1  | -2.158325000 | -1.246109000 | 1.555511000 |
| 6  | 0.000000000  | -1.409970000 | 1.606411000 |



|   |              |              |              |
|---|--------------|--------------|--------------|
| 1 | 0.000000000  | -2.492219000 | 1.555511000  |
| 1 | 0.000000000  | 2.492219000  | 1.555511000  |
| 6 | -0.704985000 | -1.221069000 | -1.606411000 |
| 6 | 0.704985000  | -1.221069000 | -1.606411000 |
| 6 | -1.409970000 | 0.000000000  | -1.606411000 |
| 1 | 1.246109000  | -2.158325000 | -1.555511000 |
| 1 | -2.492219000 | 0.000000000  | -1.555511000 |
| 6 | 1.409970000  | 0.000000000  | -1.606411000 |
| 6 | -0.704985000 | 1.221069000  | -1.606411000 |
| 1 | 2.492219000  | 0.000000000  | -1.555511000 |
| 1 | -1.246109000 | 2.158325000  | -1.555511000 |
| 6 | 0.704985000  | 1.221069000  | -1.606411000 |
| 1 | 1.246109000  | 2.158325000  | -1.555511000 |
| 1 | -1.246109000 | -2.158325000 | -1.555511000 |

$V(\text{Bz})_2^-$ , LM

Frequencies = 62.3332  $\text{cm}^{-1}$

HF = -1407.939375 a.u.

|    |              |              |              |
|----|--------------|--------------|--------------|
| 23 | 0.000000000  | 0.000000000  | 0.000000000  |
| 6  | 0.708112000  | 1.226485000  | 1.649188000  |
| 6  | 1.416223000  | 0.000000000  | 1.649188000  |
| 6  | -0.708112000 | 1.226485000  | 1.649188000  |
| 1  | 2.503879000  | 0.000000000  | 1.613434000  |
| 1  | -1.251939000 | 2.168422000  | 1.613434000  |
| 6  | 0.708112000  | -1.226485000 | 1.649188000  |
| 6  | -1.416223000 | 0.000000000  | 1.649188000  |
| 1  | 1.251939000  | -2.168422000 | 1.613434000  |
| 1  | -2.503879000 | 0.000000000  | 1.613434000  |
| 6  | -0.708112000 | -1.226485000 | 1.649188000  |
| 1  | -1.251939000 | -2.168422000 | 1.613434000  |
| 1  | 1.251939000  | 2.168422000  | 1.613434000  |
| 6  | -1.416223000 | 0.000000000  | -1.649188000 |
| 6  | -0.708112000 | -1.226485000 | -1.649188000 |
| 6  | -0.708112000 | 1.226485000  | -1.649188000 |
| 1  | -1.251939000 | -2.168422000 | -1.613434000 |
| 1  | -1.251939000 | 2.168422000  | -1.613434000 |
| 6  | 0.708112000  | -1.226485000 | -1.649188000 |
| 6  | 0.708112000  | 1.226485000  | -1.649188000 |
| 1  | 1.251939000  | -2.168422000 | -1.613434000 |
| 1  | 1.251939000  | 2.168422000  | -1.613434000 |
| 6  | 1.416223000  | 0.000000000  | -1.649188000 |
| 1  | 2.503879000  | 0.000000000  | -1.613434000 |
| 1  | -2.503879000 | 0.000000000  | -1.613434000 |

V(Bz)<sub>2</sub><sup>-</sup>, TS

Frequencies = -66.3346 cm<sup>-1</sup>

HF = -1407.937265 a.u.

|    |              |              |              |
|----|--------------|--------------|--------------|
| 23 | 0.000000000  | 0.000000000  | 0.000000000  |
| 6  | 1.001208000  | 1.001208000  | -1.652265000 |
| 6  | -0.366467000 | 1.367675000  | -1.652265000 |
| 6  | 1.367675000  | -0.366467000 | -1.652265000 |
| 1  | -0.647935000 | 2.418125000  | -1.612916000 |
| 1  | 2.418125000  | -0.647935000 | -1.612916000 |
| 6  | -1.367675000 | 0.366467000  | -1.652265000 |
| 6  | 0.366467000  | -1.367675000 | -1.652265000 |
| 1  | -2.418125000 | 0.647935000  | -1.612916000 |
| 1  | 0.647935000  | -2.418125000 | -1.612916000 |
| 6  | -1.001208000 | -1.001208000 | -1.652265000 |
| 1  | -1.770190000 | -1.770190000 | -1.612916000 |
| 1  | 1.770190000  | 1.770190000  | -1.612916000 |
| 6  | -0.366467000 | -1.367675000 | 1.652265000  |
| 6  | -1.367675000 | -0.366467000 | 1.652265000  |
| 6  | 1.001208000  | -1.001208000 | 1.652265000  |
| 1  | -2.418125000 | -0.647935000 | 1.612916000  |
| 1  | 1.770190000  | -1.770190000 | 1.612916000  |
| 6  | -1.001208000 | 1.001208000  | 1.652265000  |
| 6  | 1.367675000  | 0.366467000  | 1.652265000  |
| 1  | -1.770190000 | 1.770190000  | 1.612916000  |
| 1  | 2.418125000  | 0.647935000  | 1.612916000  |
| 6  | 0.366467000  | 1.367675000  | 1.652265000  |
| 1  | 0.647935000  | 2.418125000  | 1.612916000  |
| 1  | -0.647935000 | -2.418125000 | 1.612916000  |

Mn(Bz)<sub>2</sub><sup>+</sup>, LM

Frequencies = 39.0068 cm<sup>-1</sup>

HF = -1614.7283949 a.u.

|    |              |              |             |
|----|--------------|--------------|-------------|
| 25 | 0.000000000  | 0.000000000  | 0.000000000 |
| 6  | 0.702875000  | 1.217414000  | 1.586282000 |
| 6  | 1.405749000  | 0.000000000  | 1.586282000 |
| 6  | -0.702875000 | 1.217414000  | 1.586282000 |
| 1  | 2.486193000  | 0.000000000  | 1.525140000 |
| 1  | -1.243097000 | 2.153106000  | 1.525140000 |
| 6  | 0.702875000  | -1.217414000 | 1.586282000 |
| 6  | -1.405749000 | 0.000000000  | 1.586282000 |
| 1  | 1.243097000  | -2.153106000 | 1.525140000 |
| 1  | -2.486193000 | 0.000000000  | 1.525140000 |
| 6  | -0.702875000 | -1.217414000 | 1.586282000 |
| 1  | -1.243097000 | -2.153106000 | 1.525140000 |

|   |              |              |              |
|---|--------------|--------------|--------------|
| 1 | 1.243097000  | 2.153106000  | 1.525140000  |
| 6 | -1.405749000 | 0.000000000  | -1.586282000 |
| 6 | -0.702875000 | -1.217414000 | -1.586282000 |
| 6 | -0.702875000 | 1.217414000  | -1.586282000 |
| 1 | -1.243097000 | -2.153106000 | -1.525140000 |
| 1 | -1.243097000 | 2.153106000  | -1.525140000 |
| 6 | 0.702875000  | -1.217414000 | -1.586282000 |
| 6 | 0.702875000  | 1.217414000  | -1.586282000 |
| 1 | 1.243097000  | -2.153106000 | -1.525140000 |
| 1 | 1.243097000  | 2.153106000  | -1.525140000 |
| 6 | 1.405749000  | 0.000000000  | -1.586282000 |
| 1 | 2.486193000  | 0.000000000  | -1.525140000 |
| 1 | -2.486193000 | 0.000000000  | -1.525140000 |

Mn(Bz)<sub>2</sub><sup>+</sup>, TS

Frequencies = -60.8343 cm<sup>-1</sup>

HF = -1614.727317 a.u.

|    |              |              |              |
|----|--------------|--------------|--------------|
| 25 | 0.000000000  | 0.000000000  | 0.000000000  |
| 6  | -0.363777000 | -1.357633000 | 1.590283000  |
| 6  | -1.357633000 | -0.363777000 | 1.590283000  |
| 6  | 0.993857000  | -0.993857000 | 1.590283000  |
| 1  | -2.401258000 | -0.643415000 | 1.527290000  |
| 1  | 1.757843000  | -1.757843000 | 1.527290000  |
| 6  | -0.993857000 | 0.993857000  | 1.590283000  |
| 6  | 1.357633000  | 0.363777000  | 1.590283000  |
| 1  | -1.757843000 | 1.757843000  | 1.527290000  |
| 1  | 2.401258000  | 0.643415000  | 1.527290000  |
| 6  | 0.363777000  | 1.357633000  | 1.590283000  |
| 1  | 0.643415000  | 2.401258000  | 1.527290000  |
| 1  | -0.643415000 | -2.401258000 | 1.527290000  |
| 6  | 0.993857000  | 0.993857000  | -1.590283000 |
| 6  | -0.363777000 | 1.357633000  | -1.590283000 |
| 6  | 1.357633000  | -0.363777000 | -1.590283000 |
| 1  | -0.643415000 | 2.401258000  | -1.527290000 |
| 1  | 2.401258000  | -0.643415000 | -1.527290000 |
| 6  | -1.357633000 | 0.363777000  | -1.590283000 |
| 6  | 0.363777000  | -1.357633000 | -1.590283000 |
| 1  | -2.401258000 | 0.643415000  | -1.527290000 |
| 1  | 0.643415000  | -2.401258000 | -1.527290000 |
| 6  | -0.993857000 | -0.993857000 | -1.590283000 |
| 1  | -1.757843000 | -1.757843000 | -1.527290000 |
| 1  | 1.757843000  | 1.757843000  | -1.527290000 |

Mn(Bz)(Cp), LM

Frequencies = 9.7139 cm<sup>-1</sup>

HF = -1576.2456221 a.u.

|    |              |              |              |
|----|--------------|--------------|--------------|
| 25 | -0.000310000 | 0.016490000  | 0.002307000  |
| 6  | 1.266439000  | -1.504629000 | 0.617529000  |
| 6  | 1.167072000  | -1.505863000 | -0.788700000 |
| 6  | 0.097570000  | -1.500365000 | 1.407168000  |
| 1  | 2.061282000  | -1.414191000 | -1.391981000 |
| 1  | 0.173529000  | -1.412114000 | 2.483415000  |
| 6  | -0.099987000 | -1.503393000 | -1.406739000 |
| 6  | -1.170930000 | -1.497134000 | 0.788703000  |
| 1  | -0.175027000 | -1.411014000 | -2.482773000 |
| 1  | -2.065232000 | -1.407804000 | 1.392023000  |
| 6  | -1.269197000 | -1.499087000 | -0.618556000 |
| 1  | -2.238499000 | -1.407429000 | -1.091766000 |
| 1  | 2.236674000  | -1.416226000 | 1.089438000  |
| 6  | 0.497090000  | 1.735347000  | -1.098010000 |
| 6  | -0.891717000 | 1.735781000  | -0.808550000 |
| 6  | -1.045928000 | 1.736059000  | 0.601611000  |
| 6  | 0.247553000  | 1.734667000  | 1.183703000  |
| 6  | 1.201203000  | 1.734533000  | 0.133360000  |
| 1  | 0.940217000  | 1.721677000  | -2.082614000 |
| 1  | -1.690970000 | 1.723619000  | -1.534467000 |
| 1  | -1.983101000 | 1.724414000  | 1.137658000  |
| 1  | 0.467809000  | 1.721927000  | 2.240619000  |
| 1  | 2.274498000  | 1.719693000  | 0.250624000  |

Mn(Bz)(Cp), TS

Frequencies = -26.7583 cm<sup>-1</sup>

HF = -1576.2455632 a.u.

|    |              |              |              |
|----|--------------|--------------|--------------|
| 25 | -0.015551000 | -0.001518000 | 0.000000000  |
| 6  | 1.505799000  | 1.220296000  | 0.704854000  |
| 6  | 1.505799000  | 1.220296000  | -0.704854000 |
| 6  | 1.502617000  | -0.000539000 | 1.410387000  |
| 1  | 1.413822000  | 2.154571000  | -1.243959000 |
| 1  | 1.412899000  | 0.000262000  | 2.489200000  |
| 6  | 1.502617000  | -0.000539000 | -1.410387000 |
| 6  | 1.499537000  | -1.222559000 | 0.705549000  |
| 1  | 1.412899000  | 0.000262000  | -2.489200000 |
| 1  | 1.410694000  | -2.156664000 | 1.245136000  |
| 6  | 1.499537000  | -1.222559000 | -0.705549000 |
| 1  | 1.410694000  | -2.156664000 | -1.245136000 |
| 1  | 1.413822000  | 2.154571000  | 1.243959000  |
| 6  | -1.733027000 | 0.374032000  | -1.147693000 |
| 6  | -1.736673000 | -0.975205000 | -0.709264000 |

|   |              |              |              |
|---|--------------|--------------|--------------|
| 6 | -1.736673000 | -0.975205000 | 0.709264000  |
| 6 | -1.733027000 | 0.374032000  | 1.147693000  |
| 6 | -1.730719000 | 1.207992000  | 0.000000000  |
| 1 | -1.718758000 | 0.707682000  | -2.174559000 |
| 1 | -1.726587000 | -1.848933000 | -1.343755000 |
| 1 | -1.726587000 | -1.848933000 | 1.343755000  |
| 1 | -1.718758000 | 0.707682000  | 2.174559000  |
| 1 | -1.715502000 | 2.287705000  | 0.000000000  |

**Mn(Bz)(Cp), TS**

Frequencies = -28.5232 cm<sup>-1</sup>

HF = -1576.2455376 a.u.

|    |              |              |              |
|----|--------------|--------------|--------------|
| 25 | -0.015735000 | 0.001529000  | 0.000000000  |
| 6  | 1.498015000  | -0.706555000 | -1.221973000 |
| 6  | 1.493191000  | -1.412265000 | 0.000000000  |
| 6  | 1.506480000  | 0.703808000  | -1.221163000 |
| 1  | 1.402794000  | -2.490892000 | 0.000000000  |
| 1  | 1.418534000  | 1.244535000  | -2.154846000 |
| 6  | 1.498015000  | -0.706555000 | 1.221973000  |
| 6  | 1.511627000  | 1.408200000  | 0.000000000  |
| 1  | 1.405023000  | -1.245018000 | 2.156412000  |
| 1  | 1.425485000  | 2.487402000  | 0.000000000  |
| 6  | 1.506480000  | 0.703808000  | 1.221163000  |
| 1  | 1.418534000  | 1.244535000  | 2.154846000  |
| 1  | 1.405023000  | -1.245018000 | -2.156412000 |
| 6  | -1.734540000 | 0.977151000  | 0.709327000  |
| 6  | -1.734540000 | 0.977151000  | -0.709327000 |
| 6  | -1.733594000 | -0.372172000 | -1.147697000 |
| 6  | -1.732799000 | -1.206135000 | 0.000000000  |
| 6  | -1.733594000 | -0.372172000 | 1.147697000  |
| 1  | -1.722699000 | 1.850844000  | 1.343820000  |
| 1  | -1.722699000 | 1.850844000  | -1.343820000 |
| 1  | -1.720040000 | -0.706022000 | -2.174501000 |
| 1  | -1.720991000 | -2.285885000 | 0.000000000  |
| 1  | -1.720040000 | -0.706022000 | 2.174501000  |

**Cr(Bz)(Cp)<sup>-</sup>, LM**

Frequencies = 16.4655 cm<sup>-1</sup>

HF = -1469.7253816 a.u.

|    |              |              |              |
|----|--------------|--------------|--------------|
| 24 | -0.000170000 | -0.012999000 | 0.002262000  |
| 6  | 1.274971000  | -1.548918000 | 0.620307000  |
| 6  | 1.174283000  | -1.550707000 | -0.794644000 |
| 6  | 0.098931000  | -1.543663000 | 1.415897000  |
| 1  | 2.071576000  | -1.461067000 | -1.400679000 |

|   |              |              |              |
|---|--------------|--------------|--------------|
| 1 | 0.175934000  | -1.459993000 | 2.496411000  |
| 6 | -0.100820000 | -1.548526000 | -1.415835000 |
| 6 | -1.178247000 | -1.540154000 | 0.794047000  |
| 1 | -0.175988000 | -1.458828000 | -2.496021000 |
| 1 | -2.076212000 | -1.454585000 | 1.399563000  |
| 6 | -1.277255000 | -1.543036000 | -0.622350000 |
| 1 | -2.250191000 | -1.454964000 | -1.097639000 |
| 1 | 2.249311000  | -1.463939000 | 1.093470000  |
| 6 | 0.497901000  | 1.786487000  | -1.098878000 |
| 6 | -0.892699000 | 1.788550000  | -0.809646000 |
| 6 | -1.047857000 | 1.789247000  | 0.602430000  |
| 6 | 0.247189000  | 1.788131000  | 1.186235000  |
| 6 | 1.202416000  | 1.786154000  | 0.134621000  |
| 1 | 0.942661000  | 1.782749000  | -2.085181000 |
| 1 | -1.693414000 | 1.787056000  | -1.537234000 |
| 1 | -1.987453000 | 1.788736000  | 1.138732000  |
| 1 | 0.467266000  | 1.786570000  | 2.245469000  |
| 1 | 2.277902000  | 1.782657000  | 0.252664000  |

Cr(Bz)(Cp)<sup>-</sup>, TS

Frequencies = -32.3892 cm<sup>-1</sup>

HF = -1469.7252613 a.u.

|    |              |              |              |
|----|--------------|--------------|--------------|
| 24 | 0.013445000  | 0.004747000  | 0.000000000  |
| 6  | 1.540044000  | -0.710575000 | -1.229780000 |
| 6  | 1.533014000  | -1.421083000 | 0.000000000  |
| 6  | 1.553119000  | 0.708659000  | -1.228646000 |
| 1  | 1.442665000  | -2.503690000 | 0.000000000  |
| 1  | 1.470914000  | 1.251961000  | -2.165879000 |
| 6  | 1.540044000  | -0.710575000 | 1.229780000  |
| 6  | 1.559582000  | 1.417302000  | 0.000000000  |
| 1  | 1.450526000  | -1.250644000 | 2.168163000  |
| 1  | 1.479523000  | 2.500834000  | 0.000000000  |
| 6  | 1.553119000  | 0.708659000  | 1.228646000  |
| 1  | 1.470914000  | 1.251961000  | 2.165879000  |
| 1  | 1.450526000  | -1.250644000 | -2.168163000 |
| 6  | -1.789808000 | 0.977522000  | 0.710287000  |
| 6  | -1.789808000 | 0.977522000  | -0.710287000 |
| 6  | -1.785728000 | -0.373634000 | -1.149290000 |
| 6  | -1.782944000 | -1.208487000 | 0.000000000  |
| 6  | -1.785728000 | -0.373634000 | 1.149290000  |
| 1  | -1.791133000 | 1.853084000  | 1.346032000  |
| 1  | -1.791133000 | 1.853084000  | -1.346032000 |
| 1  | -1.782613000 | -0.708415000 | -2.178193000 |
| 1  | -1.778017000 | -2.290439000 | 0.000000000  |

|   |              |              |             |
|---|--------------|--------------|-------------|
| 1 | -1.782613000 | -0.708415000 | 2.178193000 |
|---|--------------|--------------|-------------|

**Cr(Bz)(Cp)<sup>-</sup>, TS**

Frequencies = -28.2722 cm<sup>-1</sup>

HF = -1469.7252887 a.u.

|    |              |              |              |
|----|--------------|--------------|--------------|
| 24 | 0.013304000  | 0.002389000  | 0.000000000  |
| 6  | 1.554749000  | 1.228353000  | 0.709122000  |
| 6  | 1.554749000  | 1.228353000  | -0.709122000 |
| 6  | 1.546423000  | 0.000144000  | 1.419311000  |
| 1  | 1.471263000  | 2.166853000  | -1.250093000 |
| 1  | 1.461038000  | 0.001927000  | 2.502403000  |
| 6  | 1.546423000  | 0.000144000  | -1.419311000 |
| 6  | 1.538564000  | -1.229913000 | 0.710191000  |
| 1  | 1.461038000  | 0.001927000  | -2.502403000 |
| 1  | 1.450809000  | -2.167226000 | 1.252264000  |
| 6  | 1.538564000  | -1.229913000 | -0.710191000 |
| 1  | 1.450809000  | -2.167226000 | -1.252264000 |
| 1  | 1.471263000  | 2.166853000  | 1.250093000  |
| 6  | -1.787044000 | 0.373203000  | -1.149316000 |
| 6  | -1.786102000 | -0.977848000 | -0.710196000 |
| 6  | -1.786102000 | -0.977848000 | 0.710196000  |
| 6  | -1.787044000 | 0.373203000  | 1.149316000  |
| 6  | -1.787437000 | 1.208265000  | 0.000000000  |
| 1  | -1.785428000 | 0.707574000  | -2.178312000 |
| 1  | -1.783784000 | -1.853484000 | -1.345885000 |
| 1  | -1.783784000 | -1.853484000 | 1.345885000  |
| 1  | -1.785428000 | 0.707574000  | 2.178312000  |
| 1  | -1.787964000 | 2.290243000  | 0.000000000  |

**Fe(Bz)(Cp)<sup>+</sup>, LM**

Frequencies = 20.5583 cm<sup>-1</sup>

HF = -1688.7565966 a.u.

|    |              |              |              |
|----|--------------|--------------|--------------|
| 26 | 0.061098000  | -0.000291000 | -0.000323000 |
| 6  | -1.486814000 | 1.354884000  | -0.380148000 |
| 6  | -1.482154000 | 1.009020000  | 0.982494000  |
| 6  | -1.490539000 | 0.348044000  | -1.361123000 |
| 1  | -1.400736000 | 1.782066000  | 1.735206000  |
| 1  | -1.411448000 | 0.613673000  | -2.407172000 |
| 6  | -1.481786000 | -0.344334000 | 1.364443000  |
| 6  | -1.489344000 | -1.004861000 | -0.979881000 |
| 1  | -1.401541000 | -0.610145000 | 2.410291000  |
| 1  | -1.410901000 | -1.777668000 | -1.733173000 |
| 6  | -1.485663000 | -1.351471000 | 0.382754000  |
| 1  | -1.407426000 | -2.390303000 | 0.675185000  |

|   |              |              |              |
|---|--------------|--------------|--------------|
| 1 | -1.405699000 | 2.393384000  | -0.673136000 |
| 6 | 1.723928000  | -1.202877000 | 0.110675000  |
| 6 | 1.723950000  | -0.479427000 | -1.109301000 |
| 6 | 1.725682000  | 0.904129000  | -0.798089000 |
| 6 | 1.726376000  | 1.035739000  | 0.614198000  |
| 6 | 1.725474000  | -0.266557000 | 1.175959000  |
| 1 | 1.696646000  | -2.277570000 | 0.210409000  |
| 1 | 1.697658000  | -0.906662000 | -2.100533000 |
| 1 | 1.699833000  | 1.714646000  | -1.510932000 |
| 1 | 1.701652000  | 1.964267000  | 1.164637000  |
| 1 | 1.699638000  | -0.503132000 | 2.228971000  |

Fe(Bz)(Cp)<sup>+</sup>, TS

Frequencies = -24.7812 cm<sup>-1</sup>

HF = -1688.7565148 a.u.

|    |              |              |              |
|----|--------------|--------------|--------------|
| 26 | -0.060927000 | -0.000011000 | 0.000000000  |
| 6  | 1.490524000  | 1.216155000  | 0.702733000  |
| 6  | 1.490524000  | 1.216155000  | -0.702733000 |
| 6  | 1.487506000  | -0.000963000 | 1.405788000  |
| 1  | 1.410696000  | 2.150702000  | -1.242230000 |
| 1  | 1.408017000  | -0.000556000 | 2.484867000  |
| 6  | 1.487506000  | -0.000963000 | -1.405788000 |
| 6  | 1.484250000  | -1.218662000 | 0.703064000  |
| 1  | 1.408017000  | -0.000556000 | -2.484867000 |
| 1  | 1.404615000  | -2.153003000 | 1.242653000  |
| 6  | 1.484250000  | -1.218662000 | -0.703064000 |
| 1  | 1.404615000  | -2.153003000 | -1.242653000 |
| 1  | 1.410696000  | 2.150702000  | 1.242230000  |
| 6  | -1.724062000 | 0.374050000  | -1.147318000 |
| 6  | -1.725924000 | -0.974756000 | -0.709043000 |
| 6  | -1.725924000 | -0.974756000 | 0.709043000  |
| 6  | -1.724062000 | 0.374050000  | 1.147318000  |
| 6  | -1.722859000 | 1.207773000  | 0.000000000  |
| 1  | -1.696297000 | 0.707698000  | -2.173756000 |
| 1  | -1.700648000 | -1.848048000 | -1.343407000 |
| 1  | -1.700648000 | -1.848048000 | 1.343407000  |
| 1  | -1.696297000 | 0.707698000  | 2.173756000  |
| 1  | -1.694689000 | 2.287069000  | 0.000000000  |

Fe(Bz)(Cp)<sup>+</sup>, TS

Frequencies = -26.3984 cm<sup>-1</sup>

HF = -1688.7565026 a.u.

|    |              |              |              |
|----|--------------|--------------|--------------|
| 26 | -0.061338000 | 0.000867000  | 0.000000000  |
| 6  | 1.484276000  | -0.704758000 | -1.217636000 |



|   |              |              |              |
|---|--------------|--------------|--------------|
| 6 | 1.481209000  | -1.407923000 | 0.000000000  |
| 6 | 1.490236000  | 0.700986000  | -1.217228000 |
| 1 | 1.400589000  | -2.486813000 | 0.000000000  |
| 1 | 1.412005000  | 1.241057000  | -2.151549000 |
| 6 | 1.484276000  | -0.704758000 | 1.217636000  |
| 6 | 1.493919000  | 1.403492000  | 0.000000000  |
| 1 | 1.403530000  | -1.243903000 | 2.152220000  |
| 1 | 1.417080000  | 2.482842000  | 0.000000000  |
| 6 | 1.490236000  | 0.700986000  | 1.217228000  |
| 1 | 1.412005000  | 1.241057000  | 2.151549000  |
| 1 | 1.403530000  | -1.243903000 | -2.152220000 |
| 6 | -1.724655000 | 0.977560000  | 0.709067000  |
| 6 | -1.724655000 | 0.977560000  | -0.709067000 |
| 6 | -1.724850000 | -0.371256000 | -1.147291000 |
| 6 | -1.724995000 | -1.205000000 | 0.000000000  |
| 6 | -1.724850000 | -0.371256000 | 1.147291000  |
| 1 | -1.697741000 | 1.850954000  | 1.343222000  |
| 1 | -1.697741000 | 1.850954000  | -1.343222000 |
| 1 | -1.697524000 | -0.704671000 | -2.173785000 |
| 1 | -1.699069000 | -2.284314000 | 0.000000000  |
| 1 | -1.697524000 | -0.704671000 | 2.173785000  |
